# Supplementary material
Source: PubMed Central journal article supplement (PMC3193947)

**Table S1:  $P_{hag-lacZ}$   $\beta$ -galactosidase assays<sup>a</sup>**

| Genotype                                                                                                          | $P_{hag-lacZ}$<br>$\beta$ -gal specific<br>activity (MU) | Strain |
|-------------------------------------------------------------------------------------------------------------------|----------------------------------------------------------|--------|
| wild type                                                                                                         | 168 $\pm$ 33                                             | DS793  |
| <i>swrA swrB</i>                                                                                                  | 16 $\pm$ 2                                               | DS3789 |
| <i>swrA swrB degU::Tn</i>                                                                                         | 175 $\pm$ 21                                             | DS3442 |
| <i>swrA swrB <math>\Delta degU</math></i>                                                                         | 168 $\pm$ 21                                             | DS3794 |
| <i>swrA swrB <math>\Delta degU</math> (<math>P_{degU}</math>-<i>degU</i>)</i>                                     | 164 $\pm$ 29                                             | DS5643 |
| <i>swrA swrB <math>\Delta degU</math> (<math>P_{degS}</math>-<i>degU</i>)</i>                                     | 155 $\pm$ 28                                             | DS5502 |
| <i>swrA swrB <math>\Delta degU</math> (<math>P_{degS}</math><math>P_{degU}</math>-<i>degU</i>)</i>                | 20 $\pm$ 1                                               | DS5503 |
| <i>swrA swrB <math>\Delta degU</math> (<math>P_{degS}</math><math>P_{degU}</math>-<i>degU</i><sup>D56A</sup>)</i> | 132 $\pm$ 11                                             | DS6563 |

<sup>a</sup>Mean  $\beta$ -galactosidase activity of three replicates  $\pm$  standard deviation.

**Table S2:  $P_{hag-lacZ}$  and  $P_{flgM-lacZ}$   $\beta$ -galactosidase assays<sup>a</sup>**

| Genotype                                          | $P_{hag-lacZ}$<br>$\beta$ -gal specific activity<br>(MU) | Strain | $P_{flgM-lacZ}$<br>$\beta$ -gal specific activity<br>(MU) | Strain |
|---------------------------------------------------|----------------------------------------------------------|--------|-----------------------------------------------------------|--------|
| wild type                                         | 124 $\pm$ 6                                              | DS793  | 37 $\pm$ 1                                                | DS811  |
| $\Delta swrA \Delta swrB$                         | 6 $\pm$ 1                                                | DS3789 | 2 $\pm$ 1                                                 | DS3792 |
| $\Delta swrA \Delta swrB \Delta degU$             | 122 $\pm$ 8                                              | DS3794 | 3 $\pm$ 1                                                 | DS3797 |
| $\Delta degU$                                     | 81 $\pm$ 9                                               | DS3654 | 3 $\pm$ 1                                                 | DS3658 |
| $\Delta swrA \Delta swrB \Delta flgM$             | 307 $\pm$ 4                                              | DS6385 | 133 $\pm$ 13                                              | DS6386 |
| $\Delta flgM$                                     | 224 $\pm$ 14                                             | DS4752 | 91 $\pm$ 14                                               | DS4754 |
| $\Delta swrA \Delta swrB \Delta flgM \Delta degU$ | 313 $\pm$ 48                                             | DS6408 | 15 $\pm$ 5                                                | DS6409 |
| $\Delta flgM \Delta degU$                         | 170 $\pm$ 5                                              | DS6859 | 37 $\pm$ 1                                                | DS6860 |

<sup>a</sup>Mean B-galactosidase activity of three replicates  $\pm$  standard deviation.

**Table S3: Plasmids**

| Plasmid  | Genotype                                                                                                    |                               |
|----------|-------------------------------------------------------------------------------------------------------------|-------------------------------|
| pAH25    | <i>amyE::spec amp</i>                                                                                       | (Blair et al., 2008)          |
| pCC1     | <i>amyE::P<sub>flhO</sub>-lacZ cat amp</i>                                                                  |                               |
| pDG268   | <i>amyE::lacZ cat amp</i>                                                                                   | (Antoniewski et al., 1990)    |
| pDG1664  | <i>thrC::erm spec amp</i>                                                                                   | (Guérout-Fleury et al., 1996) |
| pDP242   | $\Omega\Delta$ <i>swrB mls amp</i>                                                                          |                               |
| pDP365   | <i>amyE::P<sub>flgM</sub><sup><math>\Delta</math>degsite1</sup>-flgM cat amp</i>                            |                               |
| pET28a   | <i>P<sub>T7</sub> 6-His kan</i>                                                                             |                               |
| pJH24    | $\Omega\Delta$ <i>degU mls amp</i>                                                                          |                               |
| pKB17    | <i>amyE::P<sub>motA</sub>-lacZ cat amp</i>                                                                  |                               |
| pLC1     | <i>thrC::P<sub>degU</sub>-degU mls amp</i>                                                                  |                               |
| pLC2     | <i>thrC::P<sub>degs</sub>-degU mls amp</i>                                                                  |                               |
| pLC126   | <i>amyE::P<sub>lytF</sub>-lacZ cat amp</i>                                                                  |                               |
| pMF35    | <i>amyE::gfp cat amp</i>                                                                                    | (Fujita and Losick, 2002)     |
| pMarA    | <i>TnYLB-1 amp mls ori<sup>BS<sub>Ts</sub></sup></i>                                                        |                               |
| pMiniMAD | <i>ori<sup>BS<sub>Ts</sub></sup> amp mls</i>                                                                | (Patrick and Kearns, 2008)    |
| pNW43    | <i>P<sub>T7</sub> DegU-His<sub>6</sub> kan</i>                                                              | (Verhamme et al., 2007)       |
| pRC2     | <i>amyE::P<sub>flgM</sub>-flgM cat amp</i>                                                                  |                               |
| pRC7     | <i>amyE::P<sub>flgM</sub><sup><math>\Delta</math>degsite2</sup>-flgM cat amp</i>                            |                               |
| pRC9     | <i>amyE::P<sub>flgM</sub><sup><math>\Delta</math>degsite1<math>\Delta</math>degsite2</sup>-flgM cat amp</i> |                               |
| pYH5     | <i>thrC::P<sub>degs</sub>P<sub>degU</sub>-degU mls amp</i>                                                  |                               |
| pYH6     | <i>thrC::P<sub>degs</sub>P<sub>degU</sub>-deg<sup>D56E</sup> mls amp</i>                                    |                               |
| pYH7     | <i>thrC::P<sub>degs</sub>P<sub>degU</sub>-deg<sup>D56A</sup> mls amp</i>                                    |                               |
| pYH8     | <i>P<sub>T7</sub> DegS-His<sub>6</sub> kan</i>                                                              |                               |
| pYH9     | <i>amyE::P<sub>flgM</sub>-GFP spec amp</i>                                                                  |                               |

**Table S4: Primers<sup>a</sup>**

| Primer | Sequence                                      |
|--------|-----------------------------------------------|
| 346    | TCATGTATTTCATAGCCTTCAGCCTT                    |
| 596    | AGGAGAAGCTTAAGACCGATGGCCCTTGATGACC            |
| 597    | CTCCTGGATCCGACCTGCCTAGTAAAAAGGCAAGT           |
| 598    | AGGAGCCATGGGAACAATAATACAAGGAGGCGTGG           |
| 599    | AGGAGGAATTCGGCGCAAGTATCCTTCAGCCTG             |
| 600    | CTCCTCCATGGGTCACGGCGTTGTCATATATTTTTTATT       |
| 740    | ATACCTACGCCTCGTTTAGAATTC                      |
| 741    | CTCCTGTCGACCCATAATAGTGTGACATGTTTTTCA          |
| 766    | GGGAATCATTGAAGGTTGGT                          |
| 749    | TTAGAGTTATTAATGGAATTGCTGANNNNNNNNNN           |
| 798    | AGGAGGAATTCGATTCACTGAGCATGTTCTTTAAAC          |
| 799    | CTCCTGGATCCGCTTGCTATGGTTAATATCGGTTTTT         |
| 839    | AGGAGGTCGACGAAGAGCTCGTAAACAGTGAGGTC           |
| 840    | CTCCTGGATCCTCCGCTTCAGCAGCAAGATTTTTTA          |
| 917    | AGGAGGAATTCCTACGTAGAAAACGATACGCGGAC           |
| 1109   | AGGAGGGTACCAGTTTATACCCGCCAAGCCCTAC            |
| 1110   | TCCTCGGATCCCATAATTTCCCTCCGTCACGGCG            |
| 1111   | AGGAGGGATCCGTTCCGTTATCTCTTTGACTATG            |
| 1112   | CTCCTGTCGACACTCAATTTCTTCACGGTAAGTCTC          |
| 1227   | CCATCCATGGGCAATAAAACAAAGATGGATTCCAAAGTGCTG    |
| 1228   | AAGAAGCTTAAGAGATAACGGAACCTTAATCATAATAAATGTCCC |
| 1251   | AGGAGGAATTCATTTCCATTCGCGGACGGGACATG           |
| 1252   | CTCCTGGATCCATTTCCACCTTAAAAATGGCATTT           |
| 1375   | GGGAGAACTGGCTAATTGTCCGA                       |
| 1409   | GCACCGCTTGCTTATCATAATT                        |
| 1411   | GCGCTTTAAGCTGCGCAAT                           |
| 1664   | GATGTTGTGATCATGGAAATCAATATGCCAAAACG           |
| 1665   | CGTTTGGCATATTGATTTCCATGATCACAACATC            |
| 1666   | GATGTTGTGATCATGGCAATCAATATGCCAAAACG           |
| 1667   | CGTTTGGCATATTGATTGCCATGATCACAACATC            |
| 1771   | CTCCTGGATCCAATGATTTTGCATTTGCTGTTTTCTTTT       |
| 1782   | CTATATGCTTATTGTAAGAAAATAACAGG                 |
| 1812   | / 5 IRD800 / GGAGAAAAACAGAAATTCCTGCTATTTTT    |
| 1931   | / 5 IRD700 / TGTGAGGCGTGTATTAAGGAAGAAG        |
| 1981   | / 5 IRD700 / GTCGTTATTTGTTTATTATAAGGAATT      |
| 2009   | TGCAGAACTTGCCCTCTCTAAT                        |
| 2010   | AGTTTAGGGAATCAGCTGTT                          |
| 2092   | TTACTATTTTCTTTCTCGATTTTCAGAGC                 |
| 2220   | TCCTAATTTGGCATAACCCTTGT                       |
| 2221   | CTCGCTTTCCGTTGCAGTCTT                         |
| 2256   | AGGAGCTCGAGACATAAGGAGGAACTACTATGAGTAA         |
| 2257   | TCTGATCGGATCCTTATTTGTATAGTTTCATCCATG          |
| 2258   | AGGAGGCATGCGTCAGGCGTGATTAAGGAAGAA             |
| 2259   | TCCTCCTCGAGCTTTCCGTTGCAGTCTTTAAACAA           |
| 2365   | AGGAGGAATTCAGATCACTCATCTTCTAATTTGGC           |
| 2366   | CTCCTGGATCCCAAAGTCGCTTCAATTGTTCAATAA          |
| 2475   | CTCCTCTCGAGGTTCAAATGATCCATTTGATCC             |
| 2476   | AGGAGCTCGAGCTGAAAAATCGAGAAAAGAAAATAGT         |
| 2644   | CTCCTCTCGAGGTGCTTTTTTTACTATTTTCTTTTC          |
| 2645   | AGGAGCTCGAGCAAAAAACAGCTGATTCCTTAAA            |
| 2786   | CTCCTGTCGACTTTTTTACTATTTTCTTTTC               |
| 2787   | AGGAGGTCGACCAGCTGATTCCTTAAA                   |

<sup>a</sup>/5IRD800/ and /5IRD700/ indicate 5' labeled tags for infra-red detection.

## Figure Legends for Supplemental Figures

### **Figure S1: Primer extension mapping the 5'-end of the *B. subtilis flgM* transcript.**

Total RNA was isolated from exponentially growing strain 3610 and primer extension mapping was performed as described in Experimental procedures. The bottom lane shows the single transcript end detected for *flgM* transcript using probe 1409. The four upper lanes show the sequence ladder used to pinpoint the likely *flgM* transcription start, which is indicated in the sequence at the top as an emboldened “a”. See text for additional details.

### **Figure S2: Analysis of phosphorylation of purified DegS-His<sub>6</sub> histidine kinase and**

**DegU-His<sub>6</sub> response regulator.** A) SDS-PAGE of DegU-His<sub>6</sub> and DegS-His<sub>6</sub> purified as described in Experimental procedures and stained with Coomassie Brilliant Blue dye.

Molecular mass markers are indicated in the left lane. B) Autophosphorylation of DegS-His<sub>6</sub> to DegS-His<sub>6</sub>~P (left six lanes) and phosphoryltransfer from DegS-His<sub>6</sub>-P to DegU (right 5 lanes) were carried out as described in Experimental procedures. The

autophosphorylation reaction was stopped at the times indicated and samples were analyzed by SDS-PAGE. DegS-His<sub>6</sub> autophosphorylation continued over the course of the reaction. For the combined phosphoryltransfer reaction, DegS-His<sub>6</sub>-P was allowed to form for 10 minutes (time = 0, lane 7) before DegU was added. The phosphoryltransfer reaction was stopped at the times indicated and samples were analyzed by SDS-PAGE.

Phosphoryltransfer to DegU appeared to occur rapidly, and the accumulation of DegU~P

is indicative of a very low phosphatase activity by DegS (see Gutu et al., 2010). See text for additional details.

**Figure S3. The primary sequences of FlgM and  $\sigma^{28}/\sigma^D$  from *S. typhimurium* and *B. subtilis* are divergent.** The protein sequences from *S. typhimurium* (Sty) and *B. subtilis* (Bsu) were aligned by CLUSTALW and presented by BOXSHADE.

**Figure S4. Mutation of DegU has modest effects on the expression of a reporter for *fla/che* operon expression.** A) Electrophoretic mobility shift experiments of the  $P_{D_3P_{fla/che}}$  promoter region. The left hand series of panels includes an increasing concentration of DegU protein. The right hand series of panels includes an increasing concentration of DegU-P protein that was phosphorylated by DegS and ATP. Concentrations of DegU are listed across the top in  $\mu\text{M}$ . Open triangles indicate the position of the unbound fragment; closed triangles indicate the position of the shifted fragment. B) Map of the promoter region for the *fla/che* operon (top) and map of the  $P_{D-3P_{fla/che}}-lacZ$  reporter construct (bottom). C) Expression of  $P_{D_3P_{fla/che}}-lacZ$  in the 3610 genetic background expressed as Miller units. The following strains were used to generate this figure: wild type (DS791), *swrA swrB* (DS3790), *swrA swrB degU* (DS3795), and *degU* (DS3713). Columns are the average of six replicas; error bars are standard deviations. D) Expression of  $P_{D-3P_{fla/che}}-lacZ$  in the 168 laboratory strain genetic background expressed as Miller units. The 168 strain is a natural *swrA* mutant, and the *swrA* gene was complemented to compare  $P_{D-3P_{fla/che}}-lacZ$  expression to the 3610 background. The following strains were used to generate this figure: *swrA*<sup>+</sup> (DS7198),

and *swrA*<sup>+</sup> *degU* (DS7202). Columns are the average of six replicas; error bars are standard deviations.



### Supplemental References:

Blair, K. M., Turner, L., Winkelman, J.T., Berg, H.C., and Kearns, D.B. (2008) A molecular clutch disables flagella in the *Bacillus subtilis* biofilm. *Science* **320**:1636-1638.

Chen, R., Guttenplan, S.B., Blair, K.M., and Kearns, D.B. (2009) Role of the  $\sigma^D$ -dependent autolysins in *Bacillus subtilis* population heterogeneity. *J Bacteriol* **191**:5775-5784.

Fujita, M., and Losick, R. (2002) An investigation into the compartmentalization of the sporulation transcription factor E in *Bacillus subtilis*. *Mol Microbiol* **43**:27-38.

Guerout-Fleury, A.-M., Frandsen, N., and Stragier, P. (1996) Plasmids for ectopic integration in *Bacillus subtilis*. *Gene* **180**:75-61.

Gutu, A.D., Wayne, K.J, Sham, L-T, Winkler, M.E. (2010) Kinetic Characterization of the WalRK<sub>Spn</sub> (VicRK) Two-Component System of *Streptococcus pneumoniae*: Dependence of WalK<sub>Spn</sub> (VicK) Phosphatase Activity on Its PAS Domain. *Journal of Bacteriology*, in press.

Patrick, J.E., and Kearns, D.B. (2008) MinJ (YvjD) is a topological determinant of cell division in *Bacillus subtilis*. *Mol Microbiol* **70**: 1166-1179.

Verhamme, D.T., Kiley, T.B., and Stanley-Wall, N.R. (2007) DegU co-ordinates multicellular behavior exhibited by *Bacillus subtilis*. *Mol Microbiol* **65**: 554-568.

Figure S1

5' aaaaggttaagattgttt3'  
3' ttttccaattctaacaaa5'

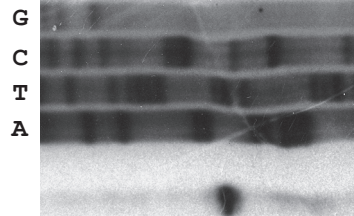

Figure S2

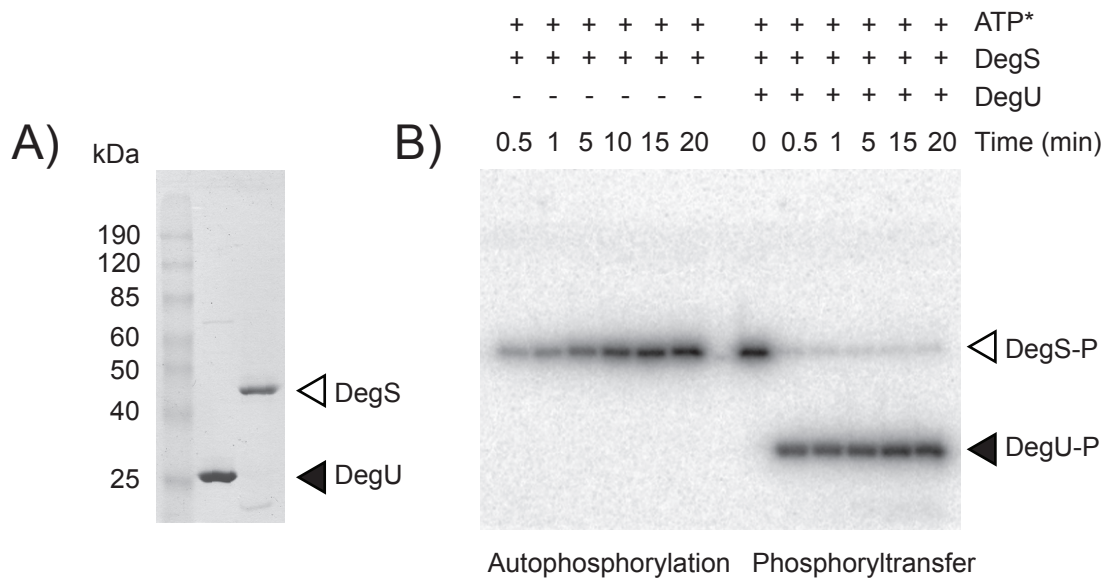

Figure S3

A)

```

Sty_FlgM 1 MSIDRTSPLKPVSTVOTRETSPTVOKTRQEKTSAAATSASVTLSDAQAKLMQPGVSDINMERVEALKTATRNGLKMDTG
Bsu_FlgM 1 MKINQFG-TQSVNPNYQK-NYDKQAVOKTVAQPQ---DKIEISSQAKEMQHASDAVTGSRQEKIAQLKAQLENGSYKVDAN

Sty_FlgM 81 KIADSLIREAQSYLQSK
Bsu_FlgM 76 HIAKNMIFNYKKQ----

```

B)

```

Sty_σ28 1 MNSLYTAEGVMDK-----HSLWQRYVPLVRHEALRLQVRLPASVELDDLQAGGIGLLNAVDRYDALQGTAFIT
Bsu_σD 1 MOSLNYEDQVLWTRWKEWKDPKAGDDL MRRYMPLVTYHVGRI SVGLPKSVHKDDLMSLGMLGLYDALEKFDPSRDLKFD

Sty_σ28 70 YAVQIRGAMLDLRSRDWVPRSVRRNAREVAQAMGOLEQELGNATETEVAERLCLPVAEYRQMLLDTNNSQIFSYDEW
Bsu_σD 81 YASFIRGAIIDGLRKEDWLPRTSREKTKKVEAAIEKLEORYLRNVSPAELAEELGCMTVQDVVSTMNEGFFANLLSIDEK

Sty_σ28 150 R--EEHGDSTELVTEEHQOENPLHQLLEGDLRQRVMDATESIPEREQLVLTLYVOEELNIKEIGAVLEVGESRVVSQIHSQ
Bsu_σD 161 LHDQDDGENTQVMIRDDKNVPPPEEKIMKDELIAQLAEKTHELSEKEQLVVSLEYKFEELTLTEIGQVNLNLSRSIQIHSK

Sty_σ28 228 AIKRLRTKLGRLL--
Bsu_σD 241 ALFKLKNLEKVIQ

```

Figure S4

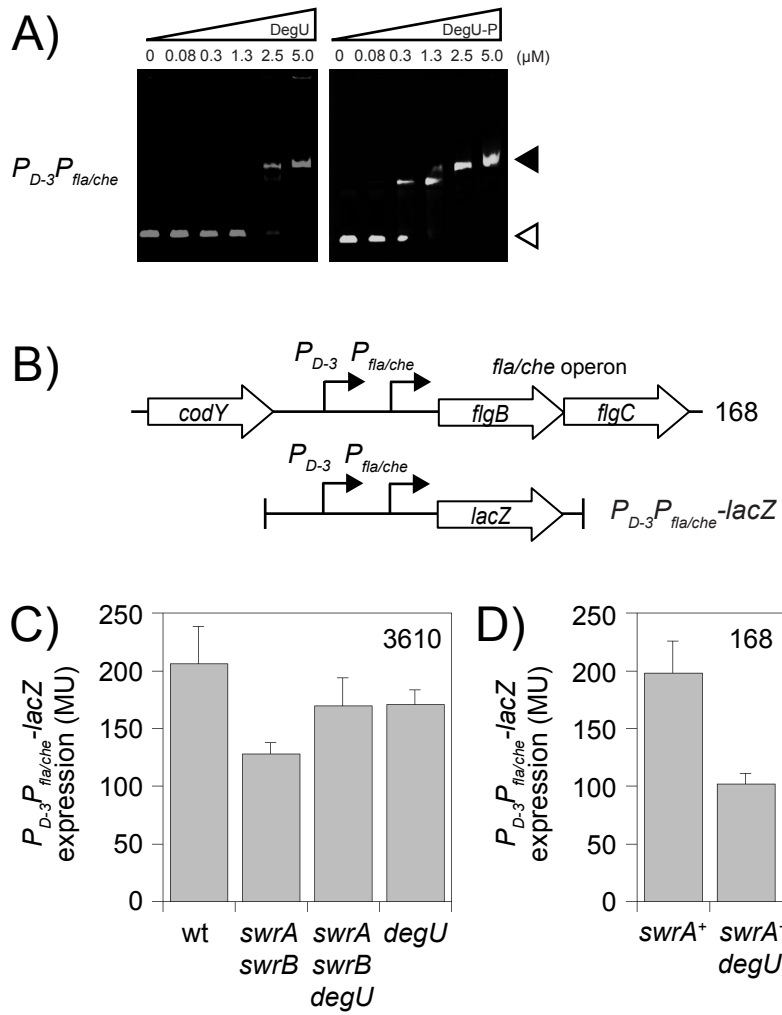

Supplement: NIHMS325054-supplement-Supp_Fig_S1-S4___Table_S1-S4.pdf [file NIHMS325054-supplement-Supp_Fig_S1-S4___Table_S1-S4.pdf]
